# Supplementary material
Source: PubMed Central journal article supplement (PMC8115274)
Supplement: 41386_2020_655_MOESM1_ESM.pdf [file 41386_2020_655_MOESM1_ESM.pdf]

**Supplemental Table 1:** Phenotypic traits investigated in the UK Biobank cohort.

| <b>UKB traits</b>                                                                       | <b>UKB Field ID</b> | <b>Sample size</b> |
|-----------------------------------------------------------------------------------------|---------------------|--------------------|
| <b>Emotional and Behavioral Response to Traumatic Events</b>                            |                     |                    |
| Felt irritable or had angry outbursts in past month                                     | 20494               | 52,816             |
| Avoided activities or situations because of previous stressful experience in past month | 20495               | 117,868            |
| Felt distant from other people in past month                                            | 20496               | 52,822             |
| Repeated disturbing thoughts of stressful experience in past month                      | 20497               | 117,900            |
| Felt very upset when reminded of stressful experience in past month                     | 20498               | 117,893            |
| <b>Exposure to Traumatic Events</b>                                                     |                     |                    |
| Physically abused by family as a child                                                  | 20488               | 117,838            |
| Felt hated by family member as a child                                                  | 20487               | 117,749            |
| Sexually molested as a child                                                            | 20490               | 116,773            |
| Physical violence by partner or ex-partner as an adult                                  | 20523               | 117,746            |
| Belittlement by partner or ex-partner as an adult                                       | 20521               | 117,741            |
| Sexual interference by partner or ex-partner without consent as an adult                | 20524               | 117,727            |
| Victim of sexual assault                                                                | 20531               | 116,671            |
| Victim of physically violent crime                                                      | 20529               | 117,846            |
| Been in serious accident believed to be life-threatening                                | 20526               | 117,922            |
| Witnessed sudden violent death                                                          | 20530               | 117,862            |
| Diagnosed with life-threatening illness                                                 | 20528               | 117,617            |
| Been involved in combat or exposed to war-zone                                          | 20527               | 117,954            |
| <b>Social Support</b>                                                                   |                     |                    |
| Felt loved as a child                                                                   | 20489               | 117,624            |
| Someone to take to doctor when needed as a child                                        | 20491               | 117,301            |
| Been in a confiding relationship as an adult                                            | 20522               | 115,099            |
| Able to pay rent/mortgage as an adult                                                   | 20425               | 116,296            |
| <b>Socioeconomic Status</b>                                                             |                     |                    |
| Average total household income before tax                                               | 738                 | 311,028            |
| Townsend deprivation index at recruitment                                               | 189                 | 360,763            |

**Supplemental Table 2: GWAS datasets with SNP heritability z-score $\geq$ 4.**

| <b>Trait</b>                                                                            | <b>Heritability z-score</b> | <b>p-value</b> |
|-----------------------------------------------------------------------------------------|-----------------------------|----------------|
| <b>CHARGE CRP</b>                                                                       | 4.668                       | 3.04E-06       |
| <b>PGC-PTSD Freeze 2</b>                                                                | 5.521                       | 3.37E-08       |
| <b>UKB Emotional and Behavioral Response to Trauma</b>                                  |                             |                |
| Felt very upset when reminded of stressful experience in past month                     | 10.038                      | 1.03E-23       |
| Repeated disturbing thoughts of stressful experience in past month                      | 9.56                        | 1.18E-21       |
| Avoided activities or situations because of previous stressful experience in past month | 6.549                       | 5.79E-11       |
| Felt distant from other people in past month                                            | 4.316                       | 1.59E-05       |
| <b>UKB Exposure to Traumatic Events</b>                                                 |                             |                |
| Physically abused by family as a child                                                  | 11.51                       | 1.18E-30       |
| Able to pay rent/mortgage as an adult                                                   | 5.348                       | 8.90E-08       |
| Physical violence by partner or ex-partner as an adult                                  | 6.152                       | 7.64E-10       |
| Felt hated by family member as a child                                                  | 10.4                        | 2.48E-25       |
| Belittlement by partner or ex-partner as an adult                                       | 9.149                       | 5.75E-20       |
| Sexually molested as a child                                                            | 6.463                       | 1.02E-10       |
| Witnessed sudden violent death                                                          | 5.886                       | 3.95E-09       |
| Victim of sexual assault                                                                | 7.269                       | 3.62E-13       |
| Victim of physically violent crime                                                      | 5.25                        | 1.52E-07       |
| <b>UKB Social Support</b>                                                               |                             |                |
| Felt loved as a child                                                                   | 14.982                      | 9.65E-51       |
| Been in a confiding relationship as an adult                                            | 7.32                        | 2.48E-13       |
| Someone to take to doctor when needed as a child                                        | 6.761                       | 1.37E-11       |
| <b>UKB Socioeconomic Status</b>                                                         |                             |                |
| Townsend deprivation index at recruitment                                               | 16.35                       | 4.35E-60       |
| Average total household income before tax                                               | 23.128                      | 2.42E-118      |

**Supplemental Table 3:** Two-sample MR result (inverse variance weighted method).

| Exposure              | Outcome               | SNP, n | Beta   | SE    | 95% CI          | p-value  | Heterogeneity/<br>pleiotropy |
|-----------------------|-----------------------|--------|--------|-------|-----------------|----------|------------------------------|
| CRP                   | PTSD                  | 859    | 0.066  | 0.027 | 0.013 – 0.119   | 0.015    | No                           |
|                       | Felt loved as a child | 1148   | -0.02  | 0.007 | -0.034 – -0.007 | 0.003    | Yes                          |
|                       |                       | 1085   | -0.017 | 0.007 | -0.031 – -0.004 | 0.009    | No (outliers removed)        |
| PTSD                  | CRP                   | 512    | 0.008  | 0.004 | 0.001 – 0.015   | 0.024    | Yes                          |
|                       |                       | 484    | 0.009  | 0.003 | 0.002 – 0.0015  | 0.009    | No (outliers removed)        |
| Felt loved as a child | CRP                   | 18     | 0.096  | 0.321 | -0.533 – 0.726  | 0.764    | No                           |
|                       | PTSD <sup>1</sup>     | 2630   | -0.139 | 0.034 | -0.206 – -0.071 | 5.64E-05 | Yes                          |
|                       |                       | 2488   | -0.190 | 0.034 | -0.257 – -0.124 | 2.10E-08 | No (outliers removed)        |
| Household income      | CRP                   | 636    | -0.141 | 0.017 | -0.175 – -0.108 | 8.83E-17 | Yes                          |
|                       |                       | 600    | -0.131 | 0.015 | -0.161 – -0.102 | 1.06E-12 | No (outliers removed)        |
|                       | PTSD <sup>1</sup>     | 2122   | -0.227 | 0.043 | -0.312 – -0.142 | 1.57E-07 | No                           |
| Deprivation index     | PTSD <sup>1</sup>     | 1065   | 0.295  | 0.066 | 0.164 – 0.426   | 9.80E-06 | Yes                          |
|                       |                       | 1004   | 0.389  | 0.065 | 0.263 – 0.516   | 1.63E-09 | No (outliers removed)        |

<sup>1</sup>PGC-PTSD freeze 1.5
